# Supplementary material for: Unprecedented Dawson isomerism induced by a central [WO5] and four 45°-rotated belt square pyramids
Source: Royal Society of Chemistry journal article supplement (doi:10.1039/c2cc36999k), 2012-01-01
Supplement: c2cc36999k.pdf [file c2cc36999k.pdf]

## Supporting Information

### Unprecedented Dawson Isomerism Induced by Central [WO<sub>5</sub>] and Four 45°-rotated Belt Square Pyramids

*Xin Xu, Huan-li Dong, Rui-li Sang, Li Xu \**

Preparation of [NH<sub>4</sub>]<sub>10</sub>[W<sub>18</sub>CuO<sub>60</sub>(H<sub>2</sub>O)] (**1**): (NH<sub>4</sub>)<sub>6</sub>H<sub>6</sub>[H<sub>3</sub>(WO<sub>4</sub>)<sub>6</sub>].H<sub>2</sub>O (0.6 g, 0.37mmol) was dissolved in a mixture of DMF (7.5 mL), CH<sub>3</sub>CN (6 mL) and H<sub>2</sub>O (4.5 mL) at room temperature. pH value is adjusted to ~2 by adding 35% HCl dropwise, resulting in a colorless solution to which Cu(CH<sub>3</sub>CO<sub>2</sub>)<sub>2</sub>·H<sub>2</sub>O (0.50 g, 2.5 mmol) was added. The resulting blue solution was stirred at 50°C for about 3h, giving a deep-green solution with white precipitate. The solution was filtered and evaporated to yield green crystals of **1** after seven days. The crystals are filtered, washed with ethanol and diethyl ether, and dried in air (yield, 55%). Calc. for N<sub>10</sub>H<sub>42</sub>W<sub>18</sub>CuO<sub>61</sub>: W 73.01, Cu 1.40; Found: W 73.90, Cu 1.29%.

Crystal data for **1**(H<sub>42</sub>N<sub>10</sub>O<sub>61</sub>CuW<sub>18</sub>):  $M_r = 4531.28$ , 0.20×0.18×0.15 mm<sup>3</sup>, green blocks; orthorhombic, space group: *I2mm*;  $a = 13.5226(9)$ ,  $b = 17.5596(12)$ ,  $c = 17.9569(13)$  Å,  $V = 4263.9(5)$  Å<sup>3</sup>,  $Z = 2$ ,  $\rho_{\text{calcd}} = 3.529$  g cm<sup>-3</sup>,  $\lambda$  (MoK $\alpha$ ) = 0.71073 Å,  $\mu = 24.493$  mm<sup>-1</sup>,  $T = 295(2)$  K,  $2\theta_{\text{max}} = 54.96^\circ$ , 15987 reflections collected, 4922 independent reflections,  $R_{\text{int}} = 0.061$ ,  $R_1 = 0.040$ , and  $R_2 = 0.077$  for  $I \geq 2\sigma(I)$ ;  $R_1 = 0.052$  and  $R_2 = 0.081$  for all data, GoF = 0.983.

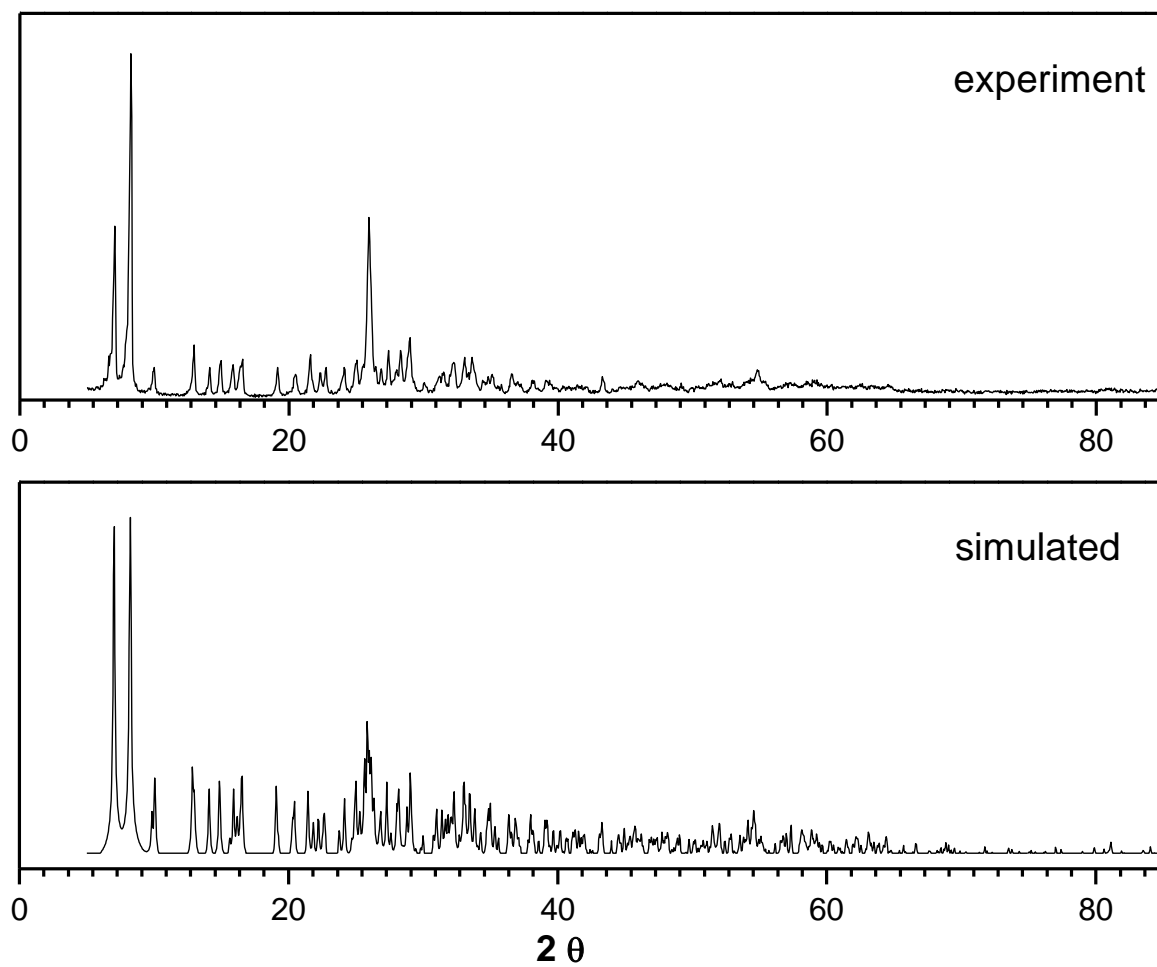

Figure S1 Simulated and experimental XRPD of  $[\text{NH}_4]_{10}[(\text{WO}_5)\text{W}_{17}\text{Cu}(\text{H}_2\text{O})\text{O}_{55}]$  (**1**)

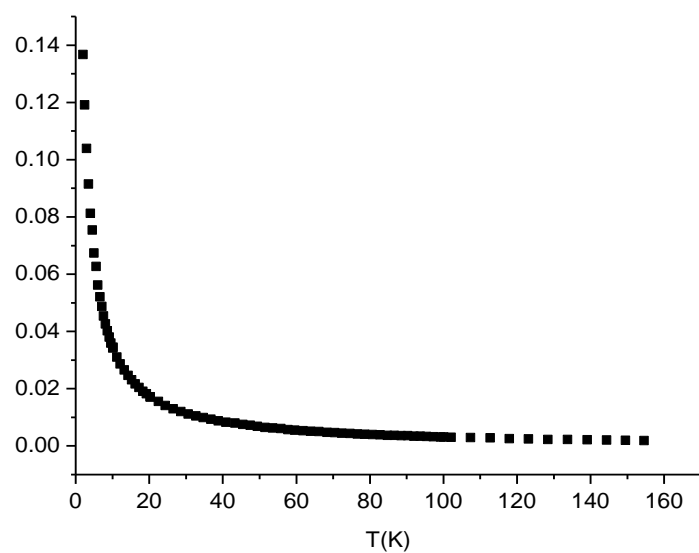

Figure S2 Temperature-dependent magnetic susceptibility of  $[\text{NH}_4]_{10}[(\text{WO}_5)\text{W}_{17}\text{Cu}(\text{H}_2\text{O})\text{O}_{55}]$  (1)

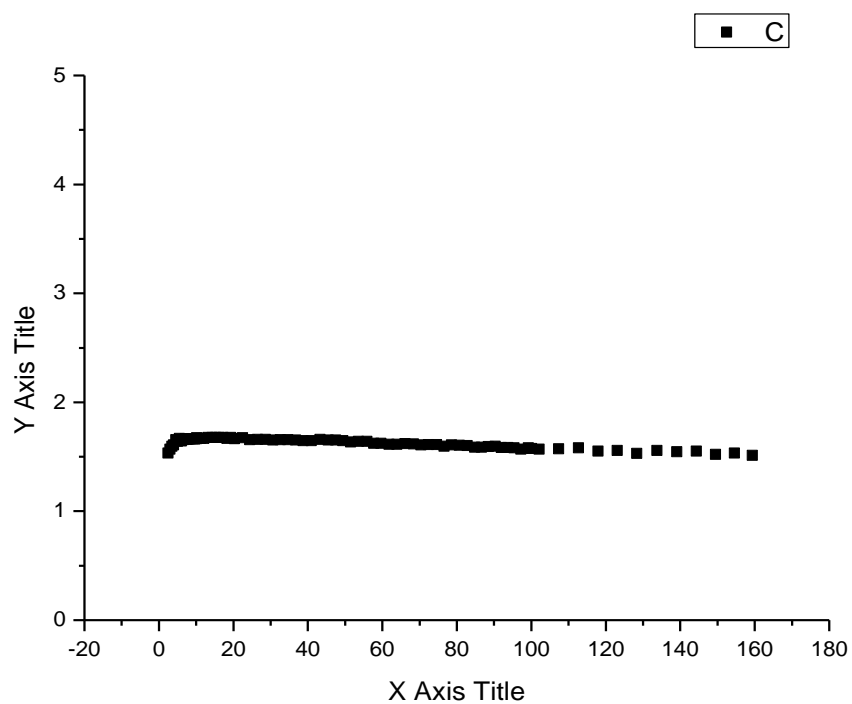

Figure S3 Temperature-dependent magnetic moments of  $[\text{NH}_4]_{10}[(\text{WO}_5)\text{W}_{17}\text{Cu}(\text{H}_2\text{O})\text{O}_{55}]$  (1)

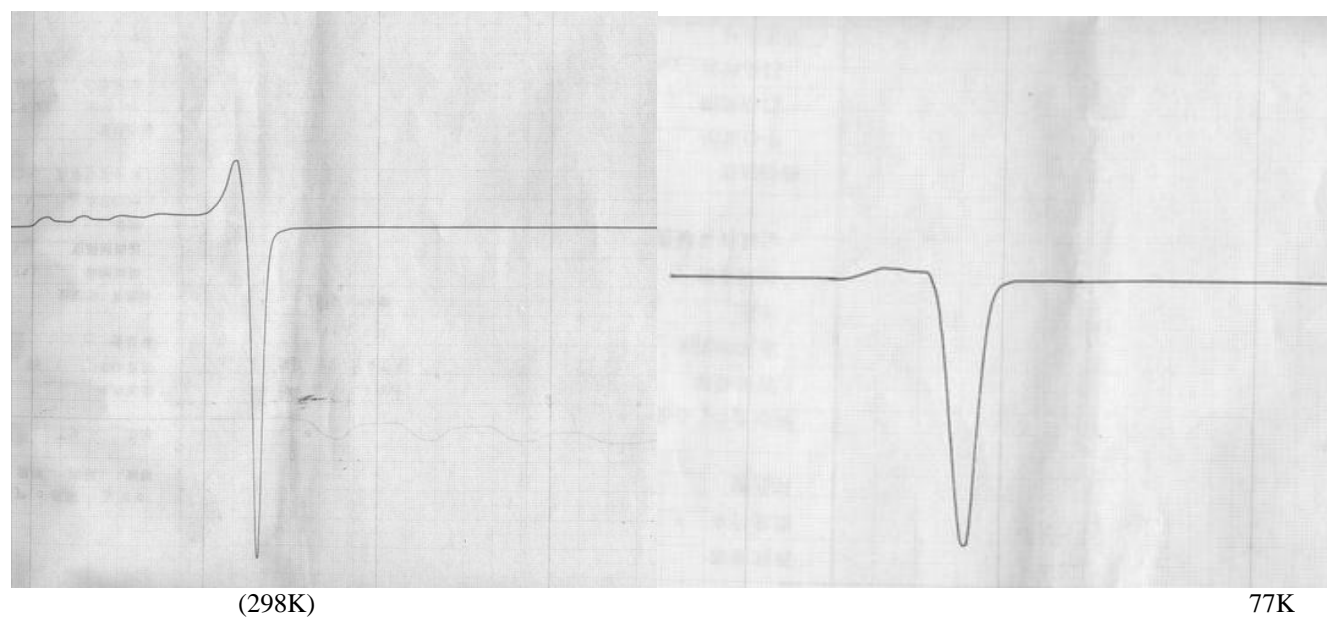

Figure S4 Electronic Paramagnetic Resonance Spectrum of  $[\text{NH}_4]_{10}[(\text{WO}_5)\text{W}_{17}\text{Cu}(\text{H}_2\text{O})\text{O}_{55}]$  (1)

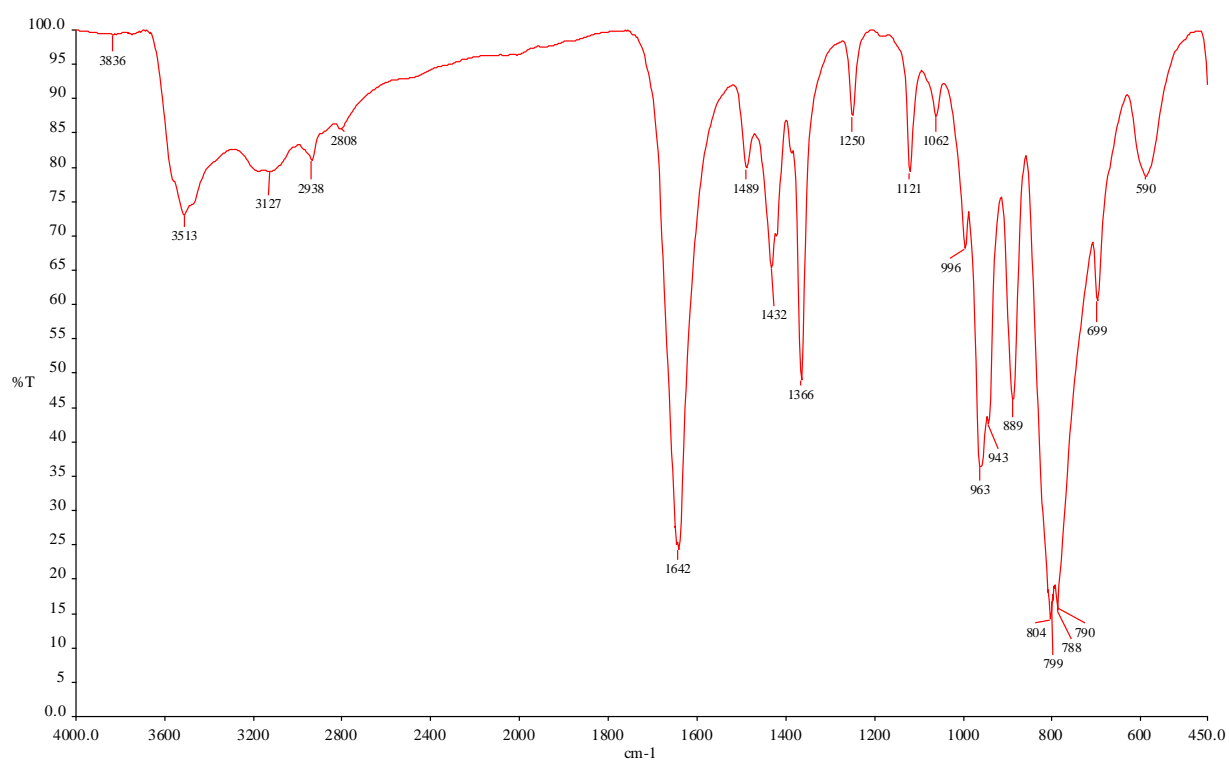

Figure S5 IR spectrum of  $[\text{NH}_4]_{10}[(\text{WO}_5)\text{W}_{17}\text{Cu}(\text{H}_2\text{O})\text{O}_{55}]$  (1)
